# Supplementary material for: Cation disordering in ankerite as a function of Fe content
Source: Copernicus journal article supplement (doi:10.5194/ejm-37-577-2025), 2025-08-25
Supplement: Supplementary file 1 [file ejm-37-577-2025-supplement.zip]

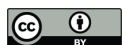

## *Supplement of*

# **Cation disordering in ankerite as a function of Fe content**

**Azzurra Zucchini et al.**

*Correspondence to:* Azzurra Zucchini ([azzurra.zucchini@unipg.it](mailto:azzurra.zucchini@unipg.it))

- [ejm-37-577-2025-supplement-title-page.pdf](#)
- Supplementary
  - [Table\\_S1.docx](#)
  - [new\\_cifs\\_def](#)
    - \* [T3450\\_rev.cif](#)
    - \* [T3600\\_rev.cif](#)
    - \* [T3750\\_rev.cif](#)
    - \* [T3800\\_rev.cif](#)
    - \* [T3\\_rev.cif](#)
    - \* [T51000\\_rev.cif](#)
    - \* [T5700\\_rev.cif](#)
    - \* [T5850\\_rev.cif](#)
    - \* [T5925\\_rev.cif](#)
    - \* [T5\\_rev.cif](#)

The copyright of individual parts of the supplement might differ from the article licence.
